# Supplementary material
Source: MDPI journal article supplement (https://www.mdpi.com/2073-4433/13/4/598)
Supplement: s1 [file s1]

# Vehicular Traffic in Urban Areas: Health Burden and Influence of Sustainable Urban Planning and Mobility

Cristina Reche \*, Aurelio Tobias and Mar Viana

Institute of Environmental Assessment and Water Research (IDAEA)-CSIC, 08034 Barcelona, Spain; aurelio.tobias@idaea.csic.es (A.T.); mar.viana@idaea.csic.es (M.V.)

\* Correspondence: cristina.reche@idaea.csic.es

## Supporting Information

### SI 1. Review of traffic emissions abatement measures

An extensive review of studies assessing decreases in traffic emissions linked to a specific abatement measure was carried out. This review was conducted in order to select intervention scenarios to be tested by means of a health impact assessments (HIA) model. Thus, the avoided premature mortality resulting from the effect on air quality of the selected traffic emissions abatement measures was modeled. This was based on the known evidence provided by epidemiological studies for the implementation of HIA of air pollution [1–4].

In total, 40 studies were finally selected, which included results based on air quality measurements and modeled scenarios. Studies based on real measurements with ambiguities when associating improvements in air quality with specific measures (due to, e.g., meteorological interferences, no control measurements, etc.) were discarded. A large amount of the studies focus on the following interventions:

- a) The creation of low-emissions zones (LEZ): Evidence of the efficiency of LEZs improving air quality is difficult to prove due to the confounding effects of meteorology, natural changes in the vehicle fleet and policy changes at the national, regional and EU levels (e.g., the introduction of zero sulfur automotive fuels). The clearest evidence is from German LEZs which can be applied to both light and heavy-duty vehicles. There is a wide range of reported reductions, between no effect up to 60% [5–12], with values usually in the range 5–15% for  $PM_x$  and 5–22% for  $NO_2$ .
- b) Long-term strategies to foster active transport modes: Increasing cycling effectively requires a network of dedicated cycle lanes with full coverage of a town or city, along with outreach campaigns to address issues related to safety perception. It is worth noting that the decision to cycle is influenced by many factors, including convenience, distance, safety perception, and weather conditions, amongst others. In a study performed in the US, the authors reported a decrease in  $PM_{2.5}$  concentrations of 1–2% when replacing short car trips with bicycling [13], while a reduction of 7% in  $NO_x$  was reported in Stockholm [14].
- c) Spatial planning—redistribution of public space: Understanding how local land use and land cover shapes the intra-urban concentrations of atmospheric pollutants—and thus human health—is a key component in designing healthier cities. Mueller et al. [15] conducted a health impact assessment (HIA) of cycling network expansions in seven European cities and concluded that if European cities achieved a cycling mode share of 24.7%, over 10,000 premature deaths could be avoided annually, associated with changes in air pollution, physical activity, and traffic incidents. Encouraging walking and bicycling requires the actual urban planning to be rethought, decreasing the density of the road network within urban cores. On the other hand, urban vegetation affects air quality through influencing pollutant deposition and dispersion [16,17]. The reduction in vehicle tracers as a result of roadside vegetation has been

**Citation:** Reche, C.; Tobias, A.; Viana, M. Vehicular Traffic in Urban Areas: Health Burden and Influence of Sustainable Urban Planning and Mobility. *Atmosphere* **2022**, *13*, 598. <https://doi.org/10.3390/atmos13040598>

Academic Editor: Carla Viegas, Yoshizumi Kajii

Received: 24 February 2022

Accepted: 31 March 2022

Published: date

**Publisher's Note:** MDPI stays neutral with regard to jurisdictional claims in published maps and institutional affiliations.

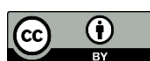

**Copyright:** © 2022 by the authors. Submitted for possible open access publication under the terms and conditions of the Creative Commons Attribution (CC BY) license (<https://creativecommons.org/licenses/by/4.0/>).

shown to reach percentages higher than 20% [18]. It should be mentioned that the amount of green space per person varies significantly within Europe, the lowest provisions being in southern and eastern areas, where an improvement is urgently required. For example, some towns in Spain and Italy have 3 to 4 square meters of green space per person, compared with more than 300 square meters per person in towns in Belgium, Finland, and France (<https://data.humdata.org/dataset/green-area-per-capita-square-meters-per-capita>, accessed on 15 September 2015).

- d) The promotion of public transport: Titos et al. [19] found a reduction of 37% in Black Carbon (BC) concentrations which was associated with a reduction in the overlap between bus lines in the downtown area, together with the introduction of brand-new buses with a higher passenger capacity and EURO V motors. Basagaña et al. [20] discovered that air pollution levels increased between 4% and 7% during public transport strikes in Barcelona (Spain), and that this increase reached up to 48% for BC during all-day strikes of the metro system. On the other hand, Bel et al. [21] assessed the effects of the introduction of the Bus Rapid Transit in Mexico City, reporting a reduction in CO concentrations of between 5.5 and 7.2%, NO<sub>x</sub> between 4.7 and 6.5%, and PM<sub>10</sub> between 7.3 and 9.2%. Di et al. [22] concluded that accessibility is an important factor influencing a commuter's decision to take public transport, reducing the use of private cars. The increase in the public transport share mode has been concluded to be directly related to a significant decrease in morbidity [23], partly linked to a decrease in air pollution. Poelman and Dijkstra [24] reported the indicators of access to public transport in European cities, making this information freely available ([http://ec.europa.eu/regional\\_policy/es/information/publications/working-papers/2015/measuring-access-to-public-transport-in-european-cities](http://ec.europa.eu/regional_policy/es/information/publications/working-papers/2015/measuring-access-to-public-transport-in-european-cities), accessed on 10 September 2021). They developed a new method of analyzing access to public transport, taking into account the extent of the urban center, the distribution of the population and the exact location of public transport stops and the frequent of departures.
- e) Traffic policies: Johansson et al. [25] found that tax reduced total road use by 15% within a charge area in Stockholm, reducing the annual average NO<sub>x</sub> concentrations for the streets with the densest traffic by up to 12%, and average PM<sub>10</sub> concentrations by 7%. Adapt the vehicle velocity to the traffic density have been proved to be an effective environmental policy, reducing NO<sub>x</sub> and PM<sub>10</sub> pollution by 7.7–17.1% and 14.5–17.3%. Conversely, although lower speed limits are associated with lower vehicle emissions, with a well-documented U-shaped relationship being found between traffic emissions and average speed, especially at constant speeds, when vehicle accelerations and decelerations are introduced into the model, the gains from lower emissions due to the reduction in speed are not as great [26].
- f) Technological improvements/road management: Currently, there are few electric vehicles, hybrids or gas vehicles in use in the EU. Experience suggests that this is unlikely to change until the cost of these vehicles is at least equivalent to conventionally fueled vehicles, and even then, it will take some time for consumers' acceptance of these technologies to grow. It is only in these countries with a long and consistent incentive program (i.e., Italy: gas; Norway: EVs and HEVs) that have achieved a significant (i.e., greater than around 5%) market share. For example, Soret et al. [27] modeled the effect of changing to a vehicle fleet with 40% of electric vehicles, which would reduce NO<sub>x</sub> concentrations by 11–17%.

**Table S1.** Review of selected studies analyzing the effectiveness of different abatement measures, aiming to reduce the exposure to traffic emissions.

| Measure                                                                                                                                           | Study                   | City                           | Parameter                                                     | Result (mean reduction)                                  | Real measurement/model | Notes                                                                                             |
|---------------------------------------------------------------------------------------------------------------------------------------------------|-------------------------|--------------------------------|---------------------------------------------------------------|----------------------------------------------------------|------------------------|---------------------------------------------------------------------------------------------------|
| Low-emission zones, i.e., zones within a city or region where vehicles have to comply with certain emission standards or are obliged to pay a fee | Lutz [9]                | Berlin, Germany                | EC, PM <sub>10</sub> , NO <sub>2</sub>                        | 14–16%, 3%, 8%                                           | Real measurement       | Comparison of concentrations within and outside LEZ. Adjusted for changes in traffic intensity    |
|                                                                                                                                                   | Bruckmann et al. [28]   | Berlin, Germany                | PM <sub>10</sub>                                              | 5–7%                                                     | Real measurement       | Comparison of annual concentrations from traffic sites before and after LEZ                       |
|                                                                                                                                                   | Invernizzi et al. [7]   | Milan, Italy                   | PM <sub>10</sub> , PM <sub>2.5</sub> , PM <sub>1</sub>        | Not significant, not significant, not significant        | Real measurement       | Short-term data                                                                                   |
|                                                                                                                                                   | Jensen et al. [8]       | Copenhagen, Denmark            | Traffic contribution to PM <sub>2.5</sub> , PM <sub>2.5</sub> | 12%, 5%                                                  | Real measurement       | Comparison of data from traffic site before and after LEZ                                         |
|                                                                                                                                                   | Qadir et al. [12]       | Munich, Germany                | Traffic contribution to PM <sub>2.5</sub> (organics, EC, OC)  | 55%                                                      | Real measurement       | Positive Matrix Factorization of PM <sub>2.5</sub> , before and after LEZ                         |
|                                                                                                                                                   | Lutz [29]               | Berlin, Germany                | Traffic contribution to EC, NO <sub>2</sub>                   | 42%, 7–10%                                               | Real measurement       | Comparison of data from traffic site before and after LEZ                                         |
|                                                                                                                                                   | Panteliadis et al. [11] | Amsterdam, Netherlands         | EC, PM <sub>10</sub> , NO <sub>2</sub> , NO <sub>x</sub>      | 12.9%, not significant, not significant, not significant | Real measurement       | Traffic contribution obtained was estimated by subtracting data from urban background site in LEZ |
|                                                                                                                                                   | Morfeld et al. [10]     | 17 German cities               | NO <sub>x</sub> , NO <sub>2</sub>                             | Not significant, not significant                         | Real measurement       | Comparison of concentrations within and outside LEZ                                               |
|                                                                                                                                                   | Wolff [30]              | German cities with LEZ in 2008 | PM <sub>10</sub>                                              | 9%                                                       | Real measurement       | Comparison of concentration trends in cities with and without LEZ                                 |
|                                                                                                                                                   | Fensterer et al. [31]   | Milan, Italy                   | PM <sub>10</sub>                                              | 13%                                                      | Real measurement       | Semi-parametric regression model, data for traffic site before and after LEZ                      |

|                                                       |                            |                                                                                                |                                                                                               |                                                |                            |                                                                                                 |
|-------------------------------------------------------|----------------------------|------------------------------------------------------------------------------------------------|-----------------------------------------------------------------------------------------------|------------------------------------------------|----------------------------|-------------------------------------------------------------------------------------------------|
|                                                       | Holman et al. [6]          | London (UK), Berlin (Germany), Munich (Germany), Amsterdam (Netherlands), Copenhagen (Denmark) | PM <sub>10</sub> , EC, NO <sub>x</sub>                                                        | 5–15%, 16%, 4%                                 | Model and real measurement | Review                                                                                          |
|                                                       | Gehrsitz [32]              | 44 German cities                                                                               | PM <sub>10</sub>                                                                              | 1.5–4%                                         | Real measurement           | Urban Traffic/Background measurements for 2005–2015, accounting for different LEZ policy phases |
|                                                       | Bruxelles Environment [33] | Brussels, Belgium                                                                              | NO <sub>2</sub> , PM <sub>2.5</sub>                                                           | 4.7%, 6.4%                                     | Model                      | Estimation based on vehicles counts and emission factors                                        |
|                                                       | Mudway et al. [34]         | London, UK                                                                                     | NO <sub>2</sub> , PM <sub>10</sub> , PM <sub>2.5</sub>                                        | 9–15%, not significant, not significant        | Real measurement           | Linear trends of pollutants for inner and outer London roadside and background sites            |
|                                                       | Santos et al. [35]         | Lisbon, Portugal                                                                               | NO <sub>2</sub> , PM <sub>10</sub> , PM <sub>2.5</sub>                                        | 13–22%, 22–25%, not significant                | Real measurement           | Linear trends of pollutants for inner and outer LEZ roadside and background sites               |
| Long-term strategies to foster active transport modes | Grabow et al. [13]         | Midwestern US                                                                                  | PM <sub>2.5</sub>                                                                             | 1–2%                                           | Model                      | Replace short car trips with bicycling (50%)                                                    |
|                                                       | Johansson et al. [14]      | Stockholm, Sweden                                                                              | NO <sub>x</sub> , BC                                                                          | 7%, 7%                                         | Model                      | Changing commuting from car to bicycle (209% increase)                                          |
| Spatial planning—redistribution of public space       | Nowak et al. [16]          | Ten US cities                                                                                  | PM <sub>2.5</sub>                                                                             | 0.05–0.24%                                     | Model                      | Removal by trees                                                                                |
|                                                       | Brantley et al. [18]       | Detroit, Michigan, US                                                                          | BC                                                                                            | 7.8–22% (depending on the wind direction)      | Real measurement           | Roadside vegetation                                                                             |
|                                                       | Jeanjean et al. [36]       | Leicester City, UK                                                                             | PM <sub>2.5</sub>                                                                             | 9%                                             | Model                      | Green infrastructure—trees dispersive effect                                                    |
|                                                       | Selmi et al. [37]          | Strasbourg, France                                                                             | CO, NO <sub>2</sub> , PM <sub>10</sub> , PM <sub>2.5</sub> , SO <sub>2</sub> , O <sub>3</sub> | 0.03%, 0.5%, 6.6%, 1.5%, 0.5%, not significant | Model                      | Promote public green spaces (27.80% of the area of the city)                                    |

|                                            |                       |                                  |                                                                                      |                                             |                  |                                                                                                                                                                                    |
|--------------------------------------------|-----------------------|----------------------------------|--------------------------------------------------------------------------------------|---------------------------------------------|------------------|------------------------------------------------------------------------------------------------------------------------------------------------------------------------------------|
|                                            | Rao et al. [38]       | Portland-Hillsboro-Vancouver, US | NO <sub>2</sub>                                                                      | 8–12%                                       | Model            | 5% change in Vegetation Management Task Force, high-intensity development, open development and tree canopy                                                                        |
|                                            | Rafael et al. [39]    | Porto, Portugal                  | NO <sub>x</sub> , PM <sub>10</sub>                                                   | 19%, 16%                                    | Model            | Implementation of a green urban area (in the center of the study area, by replacing the current buildings)                                                                         |
|                                            | Riondato et al. [40]  | Dublin, Germany                  | PM <sub>2.5</sub>                                                                    | 23%                                         | Model            | Removal by trees                                                                                                                                                                   |
|                                            | Nemitz et al. [41]    | Urban areas UK                   | PM <sub>2.5</sub>                                                                    | 1%                                          | Model            | Conversion of half of existing open urban greenspace to forest                                                                                                                     |
|                                            | Mueller et al. [15]   | Barcelona, Spain                 | NO <sub>2</sub>                                                                      | 19%                                         | Model            | Superblock design in the city center                                                                                                                                               |
| Promotion of public transport              | Titos et al. [19]     | Granada, Spain                   | BC, PM <sub>10</sub>                                                                 | 37%, 33%                                    | Real measurement | Public transportation re-organization (reduced the overlap between bus lines in downtown—50% fewer buses—and introduced brand-new buses with higher passenger capacity and EURO V) |
|                                            | Basagaña et al. [20]  | Barcelona, Spain                 | NO <sub>2</sub> , NO, PM <sub>10</sub> , PM <sub>2.5</sub> , PM <sub>1</sub> , N, BC | 4%, 7.5%, 6%, 3.5%, 6%, not significant, 4% | Real measurement | Public transport normal service in comparison with strike days                                                                                                                     |
| Traffic policies                           | Dijkema et al. [42]   | Amsterdam, Netherlands           | NO <sub>x</sub> , PM <sub>10</sub> , PM <sub>1</sub> , Black Smoke                   | 2.4%, 7.4%, 2.8%, 15%                       | Real measurement | Speed limit intervention on part of the ring highway, adjoined with apartment buildings                                                                                            |
|                                            | Johansson et al. [25] | Stockholm, Sweden                | NO <sub>2</sub> , PM <sub>10</sub>                                                   | 12%, 7%                                     | Model            | Congestion tax                                                                                                                                                                     |
|                                            | Bel et al. [43]       | Barcelona, Spain                 | NO <sub>x</sub> , PM <sub>10</sub>                                                   | 7.7–17.1%, 14.5–17.3%                       | Real measurement | Variable speed policy (depending on the traffic density)                                                                                                                           |
|                                            | Gulia et al. [44]     | Delhi city, India                | NO <sub>x</sub> , PM <sub>2.5</sub>                                                  | 0.5–1.8%, 0.4–1.9%                          | Model            | Odd–even car scheme                                                                                                                                                                |
|                                            | Bel et al. [21]       | Mexico City, Mexico              | CO, NO <sub>x</sub> , PM <sub>10</sub>                                               | 5.5–7.2%, 4.7–6.5%, 7.3–9.2%                | Real measurement | Bus Rapid Transit                                                                                                                                                                  |
| Technological improvements/road management | Soret et al. [27]     | Barcelona and Madrid, Spain      | NO <sub>x</sub>                                                                      | 11–17%                                      | Model            | 40% fleet electrification                                                                                                                                                          |
|                                            | Amato et al. [45]     | Barcelona, Spain                 | PM <sub>10</sub> , PM <sub>2.5-10</sub>                                              | Not significant, not significant            | Real measurement | Reducing road dust emission                                                                                                                                                        |

|                         |                       |                   |                                     |                    |                  |                                                                                                                                                                                                                   |
|-------------------------|-----------------------|-------------------|-------------------------------------|--------------------|------------------|-------------------------------------------------------------------------------------------------------------------------------------------------------------------------------------------------------------------|
|                         | Ferrero et al. [46]   | Milan, Italy      | NO, NO <sub>2</sub>                 | 0.4–1.5%, 0.3–0.8% | Model            | Replacement (50%) of non-electric vehicles with electric ones                                                                                                                                                     |
|                         | Harrison et al. [47]  | London, UK        | PM <sub>2.5</sub>                   | 38%                | Real measurement | Implemented diesel particle filters                                                                                                                                                                               |
|                         | Gulia et al. [44]     | Delhi city, India | NO <sub>x</sub> , PM <sub>2.5</sub> | 8.6–33.6% both     | Model            | Reducing road dust emission                                                                                                                                                                                       |
| Combination of measures | Izquierdo et al. [48] | Madrid, Spain     | NO <sub>x</sub> , PM <sub>2.5</sub> | 20%, 27%           | Model            | Central Zero Emissions Zone; regulation of car parking; speed limits; infrastructures reserved for public transport; extension and renewal of the fleet of buses and taxis; efficient urban distribution of goods |

**Table S2.** Review of traffic-related air pollution abatement measures which have proven to be successful in selected European cities. Adapted from: <http://fairmode.jrc.ec.europa.eu/measure-catalogue/> (accessed on 5 July 2021).

| City                                  | Short description                                                                                                                                                                                           | Classification                                                        |
|---------------------------------------|-------------------------------------------------------------------------------------------------------------------------------------------------------------------------------------------------------------|-----------------------------------------------------------------------|
| Barcelona, Spain                      | Intensive street cleaning expected to reduce the dust load on roads and therefore resuspension of dust                                                                                                      | Other (Traffic planning and management)                               |
| Barcelona, Spain                      | Provision of different modes of transport and optimization of the nodes                                                                                                                                     | Encouragement of shift in transport modes                             |
| London, UK                            | Accelerated uptake of cleaner taxis by introducing an age-based limit                                                                                                                                       | Other (Traffic planning and management)                               |
| London, UK                            | Traffic measure of charging a flat rate to enter central London on weekdays to reduce congestion                                                                                                            | Congestion pricing zones (Traffic planning and management)            |
| London, UK                            | Introduction of cycle superhighways                                                                                                                                                                         | Slow modes (e.g., expansion of bicycle and pedestrian infrastructure) |
| London, UK                            | Reducing unnecessary engine idling of vehicles and school buses in London and the United States                                                                                                             | Other (Public information/Education)                                  |
| London, UK                            | The website Cleaner Air for London provides up-to-date information on air quality, forecasts, and measures for different groups of users                                                                    | INTERNET (Public information/Education)                               |
| London, UK                            | Low-emission zone for vans and lorries                                                                                                                                                                      | Low-emission zones (Traffic planning and management)                  |
| London, UK                            | Best-price tickets accounting the lowest price according to the number of journeys ("Oyster card")                                                                                                          | Encouragement of shift in transport modes                             |
| London, Birmingham and Manchester, UK | Planting of trees along streets and in other urban locations, particularly in economically deprived areas                                                                                                   | Other                                                                 |
| Madrid, Spain                         | Use of compressed natural gas (CNG) buses in the public transport system                                                                                                                                    | Cleaner vehicle transport services                                    |
| Madrid, Spain                         | Retrofitting of public transport buses with Diesel particulate filters (DPF)                                                                                                                                | Retrofitting emission control equipment                               |
| Milan, Italy                          | Area C", the actual implementation of the former "Ecopass" measure, represents the LEZ area within Milan and regulates the access of private vehicles to the central urban zone under the payment of a toll | Congestion pricing zones (Traffic planning and management)            |
| Milan, Italy                          | Low-emission zone in vehicles during wintertime                                                                                                                                                             | Low-emission zones (Traffic planning and management)                  |

|                     |                                                                                                                                  |                                                                       |
|---------------------|----------------------------------------------------------------------------------------------------------------------------------|-----------------------------------------------------------------------|
| Paris, France       | Bicycles can be rented for free or at low charge for a limited amount of time throughout the city                                | Slow modes (e.g., expansion of bicycle and pedestrian infrastructure) |
| Paris, France       | Creation of new transport services based on the sharing of non-polluting vehicles: Autolib (electric vehicles in self-service)   | Other (Traffic planning and management)                               |
| Paris, France       | Extension of a new tramway line (T3) on the ring boulevards around the city of Paris                                             | Land-use planning to ensure sustainable transport facilities          |
| Paris, France       | Rebalancing program of public space in Paris, reducing areas attributed to cars and prioritizing slow modes and public transport | Slow modes (e.g., expansion of bicycle and pedestrian infrastructure) |
| Zürich, Switzerland | Limiting overall NO <sub>x</sub> emissions of Zurich airport                                                                     | Other                                                                 |

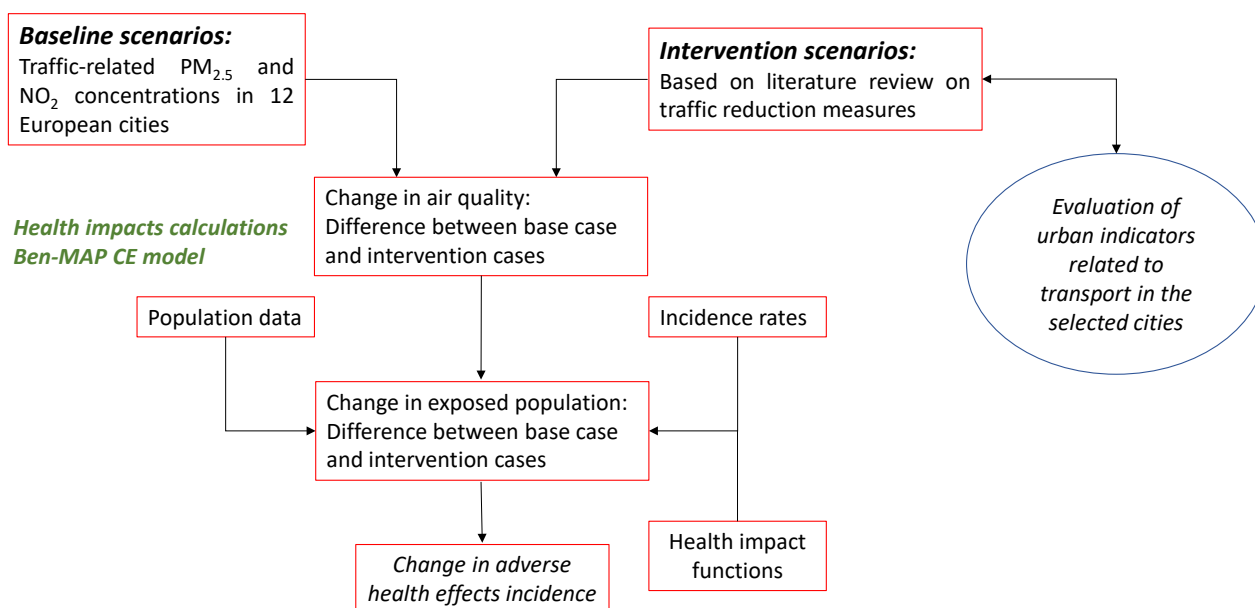

**Figure S1.** Methodology steps and the input data files required to run BenMAP-CE.

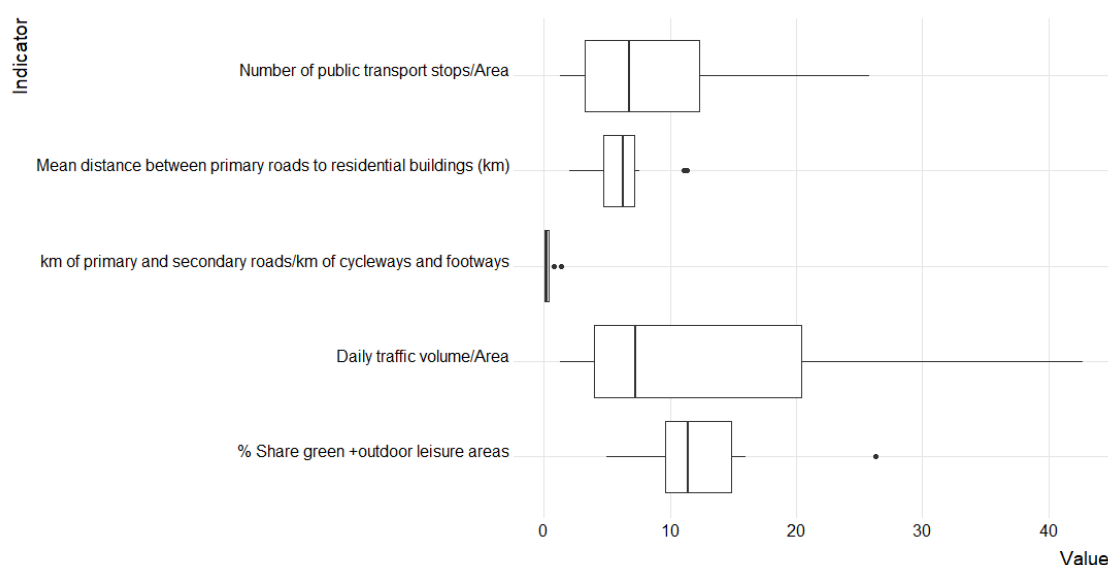

**Figure S2.** Boxplot of the distribution of different indicators in the selected cities considered relevant from an air quality perspective.

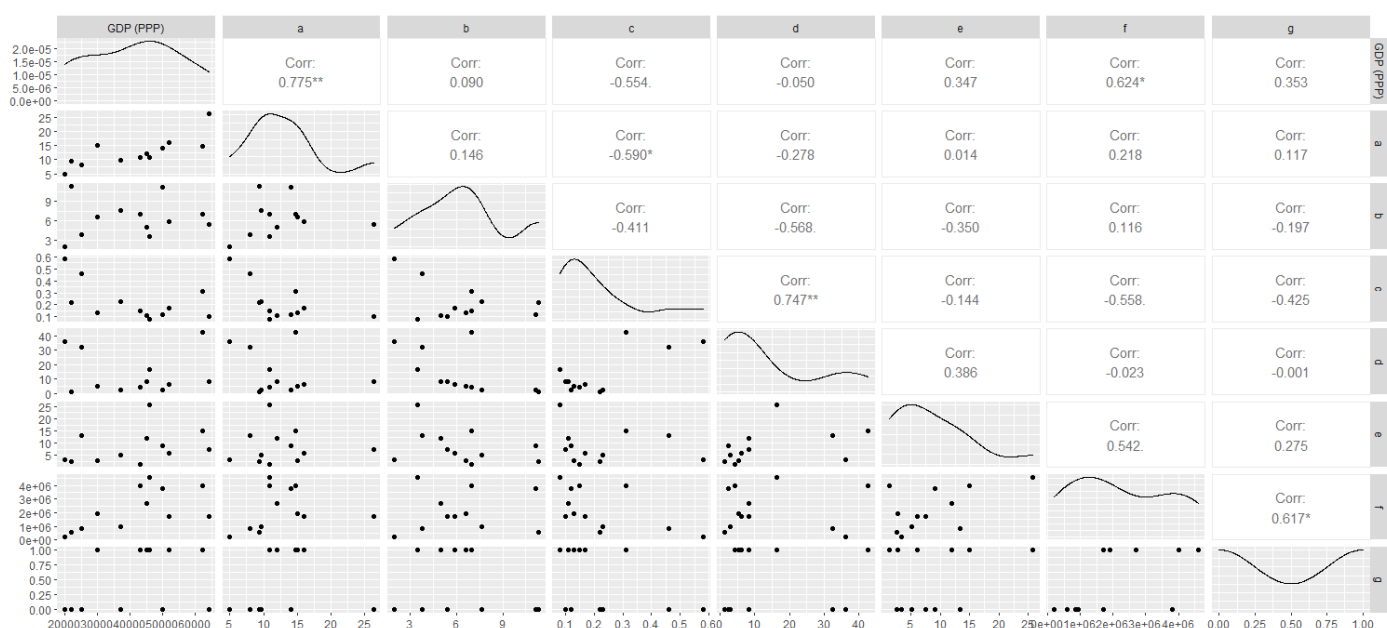

**Figure S3.** Correlogram of GDP (PPP) in the cities under study against selected city indicators. Correlation coefficients represent Pearson's correlation coefficients (r). (a) Share urban green areas (%); (b) Distance primary roads to residential buildings; (c) Road type Ratio; (d) Daily traffic volume/Area; (e) Public transport stops/Area; (f) Distribution of public transport stops Index; (g) Implementation of Low Emission Zone (0 = no)

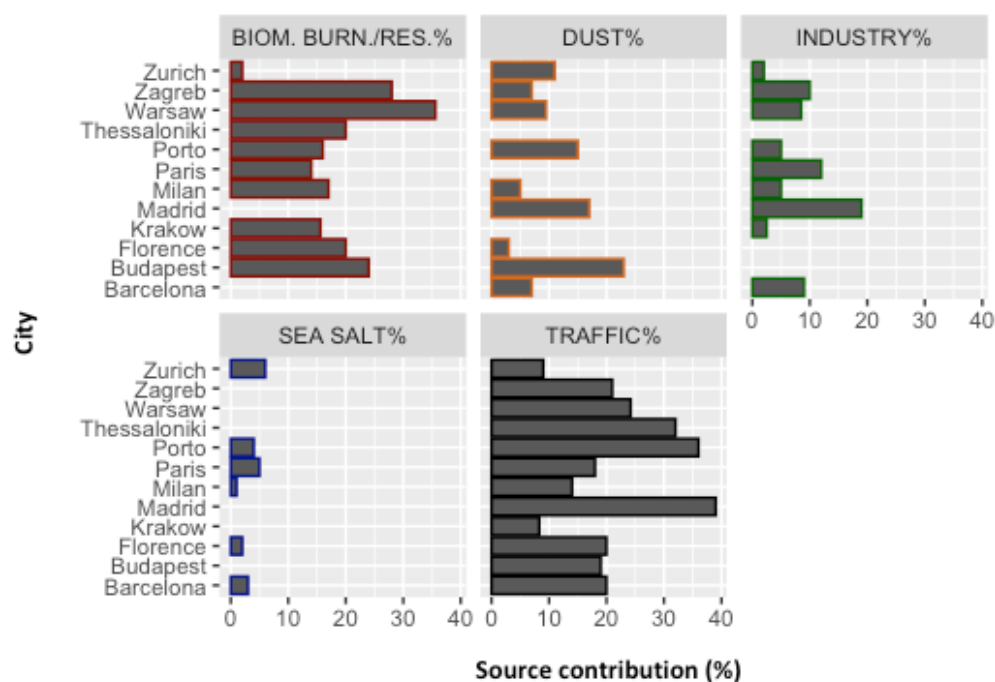

**Figure S4.** PM<sub>2.5</sub> source contributions reported in the literature for the selected cities.

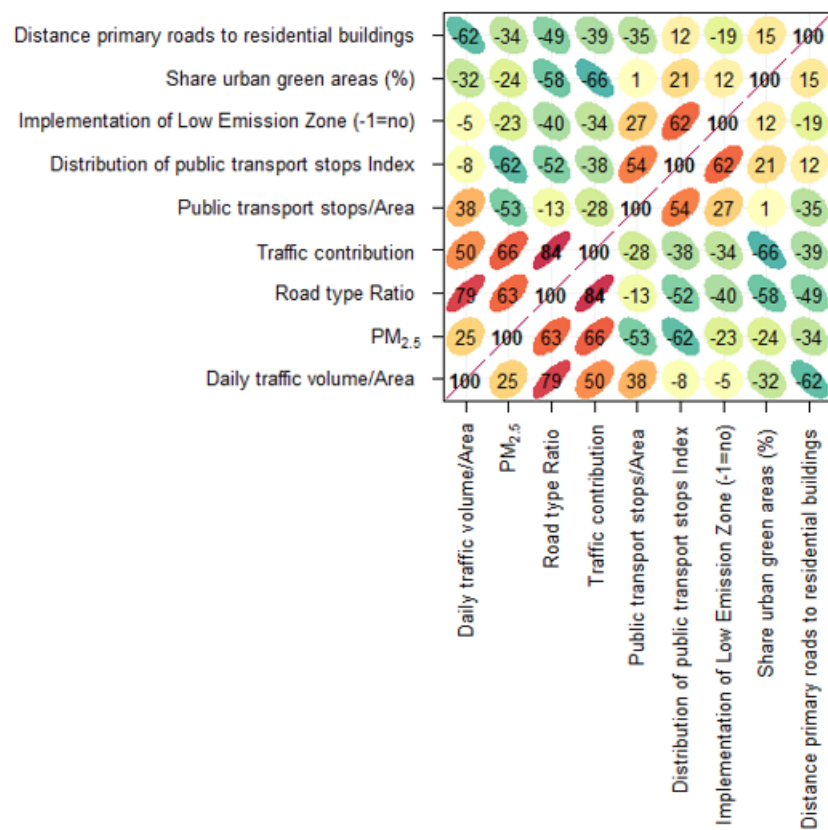

**Figure S5.** Correlation matrix including selected city indicators and PM<sub>2.5</sub> traffic contribution and PM<sub>2.5</sub> concentrations in  $\mu\text{gm}^{-3}$ .

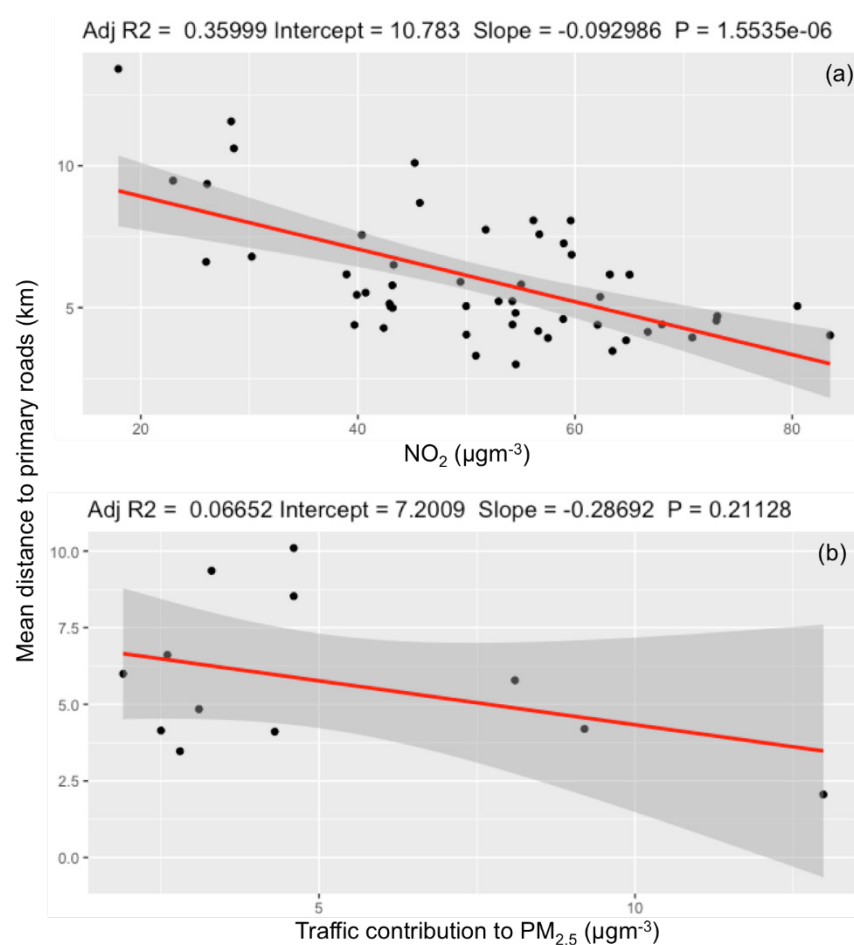

**Figure S6.** Linear regression between mean NO<sub>2</sub> (a) and PM<sub>2.5</sub> traffic contributions (b) in µgm<sup>-3</sup> against mean distance to primary roads of the different measurement points.

## References

1. Atkinson, R.W.; Kang, S.; Anderson, H.R.; Mills, I.C.; Walton, H.A. Epidemiological time series studies of PM<sub>2.5</sub> and daily mortality and hospital admissions: a systematic review and meta-analysis. *Thorax* **2014**, *69*, 660–665, <https://doi.org/10.1136/thoraxjnl-2013-204492>. Available online: <http://www.ncbi.nlm.nih.gov/pubmed/24706041> (accessed on 2 January 2019).
2. Beelen, R.; Raaschou-Nielsen, O.; Stafoggia, M.; Andersen, Z.J.; Weinmayr, G.; Hoffmann, B.; Wolf, K.; Samoli, E.; Fischer, P.; Nieuwenhuijsen, M. et al. Effects of long-term exposure to air pollution on natural-cause mortality: an analysis of 22 European cohorts within the multicentre ESCAPE project. *Lancet*, **2014**, *383*, 785–795, [https://doi.org/10.1016/S0140-6736\(13\)62158-3](https://doi.org/10.1016/S0140-6736(13)62158-3).
3. Cesaroni, G.; Badaloni, C.; Gariazzo, C.; Stafoggia, M.; Sozzi, R.; Davoli, M.; Forastiere, F. Long-Term Exposure to Urban Air Pollution and Mortality in a Cohort of More than a Million Adults in Rome. *Environ. Heal. Perspect.* **2013**, *121*, 324–331, <https://doi.org/10.1289/ehp.1205862>.
4. Ostro, B.; Tobias, A.; Querol, X.; Alastuey, A.; Amato, F.; Pey, J.; Pérez, N.; Sunyer, J. The Effects of Particulate Matter Sources on Daily Mortality: A Case-Crossover Study of Barcelona, Spain. *Environ. Heal. Perspect.* **2011**, *119*, 1781–1787, <https://doi.org/10.1289/ehp.1103618>.
5. Cyrus, J.; Peters, A.; Soentgen, J.; Wichmann, H.-E. Low emission zones reduce PM<sub>10</sub> mass concentrations and diesel soot in German cities. *J. Air Waste Manag. Assoc.* **2013**, *64*, 481–487, <https://doi.org/10.1080/10962247.2013.868380>.
6. Holman, C.; Harrison, R.; Querol, X. Review of the efficacy of low emission zones to improve urban air quality in European cities. *Atmospheric Environ.* **2015**, *111*, 161–169, <https://doi.org/10.1016/j.atmosenv.2015.04.009>.
7. Invernizzi, G.; Ruprecht, A.; Mazza, R.; De Marco, C.; Mocnik, G.; Sioutas, C.; Westerdahl, D. Measurement of black carbon concentration as an indicator of air quality benefits of traffic restriction policies within the ecopass zone in Milan, Italy. *Atmos. Environ.* **2011**, *45*, 3522–3527, <https://doi.org/10.1016/j.atmosenv.2011.04.008>.
8. Jensen, S.S.; Ketzel, M.; Nøjgaard, J. K.; Becker, T. Faglig rapport nr. 830. Hvad er effekten af miljøzoner for luftkvaliteten?—Vurdering for København, Frederiksberg, Aarhus, Odense, og Aalborg. Slutrapport. Danmarks Miljøundersøgelser, Aarhus Universitet: Aarhus, Denmark, 2011. Available online: <http://www.dmu.dk/Pub/FR830.pdf> (accessed on 23 February 2022).
9. Lutz, M. The low emission zone in Berlin – Results of a first impact assessment. *Workshop on “NO<sub>x</sub>: Time for Compliance”*, Birmingham, UK, November 2009.

10. Morfeld, P.; Groneberg, D.A.; Spallek, M.F. Effectiveness of Low Emission Zones: Large Scale Analysis of Changes in Environmental NO<sub>2</sub>, NO and NO<sub>x</sub> Concentrations in 17 German Cities. *PLoS ONE* **2014**, *9*, e102999, <https://doi.org/10.1371/journal.pone.0102999>.
11. Panteliadis, P.; Strak, M.; Hoek, G.; Weijers, E.; van der Zee, S.; Dijkema, M. Implementation of a low emission zone and evaluation of effects on air quality by long-term monitoring. *Atmospheric Environ.* **2014**, *86*, 113–119, <https://doi.org/10.1016/j.atmosenv.2013.12.035>.
12. Qadir, R.; Abbaszade, G.; Schnelle-Kreis, J.; Chow, J.; Zimmermann, R. Concentrations and source contributions of particulate organic matter before and after implementation of a low emission zone in Munich, Germany. *Environ. Pollut.* **2013**, *175*, 158–167, <https://doi.org/10.1016/j.envpol.2013.01.002>.
13. Grabow, M.L.; Spak, S.N.; Holloway, T.; Stone, B.; Mednick, A.C.; Patz, J.A. Air quality and exercise-related health benefits from reduced car travel in the Midwestern United States. *Environ. Health Perspect.* **2012**, *120*, 68–76, <https://doi.org/10.1289/ehp.1103440>.
14. Johansson, C.; Lövenheim, B.; Schantz, P.; Wahlgren, L.; Almström, P.; Markstedt, A.; Strömgren, M.; Forsberg, B.; Sommar, J.N. Impacts on air pollution and health by changing commuting from car to bicycle. *Sci Total Environ.* **2017**, *584*, 55–63, <https://doi.org/10.1016/j.scitotenv.2017.01.145>.
15. Mueller, N.; Rojas-Rueda, D.; Salmon, M.; Martínez, D.; Ambros, A.; Brand, C.; de Nazelle, A.; Dons, E.; Gaupp-Berghausen, M.; Gerike, R.; et al. Health impact assessment of cycling network expansions in European cities. *Prev. Med.* **2018**, *109*, 62–70, <https://doi.org/10.1016/j.ypmed.2017.12.011>.
16. Nowak, D.J.; Hirabayashi, S.; Bodine, A.; Hoehn, R. Modeled PM<sub>2.5</sub> removal by trees in ten U.S. cities and associated health effects. *Environ. Pollut.* **2013**, *178*, 395–402.
17. Nowak, D.J.; Hirabayashi, S.; Bodine, A.; Greenfield, E. Tree and forest effects on air quality and human health in the United States. *Environ. Pollut.* **2014**, *193*, 119–129.
18. Brantley, H.L.; Hagler, G.; Deshmukh, P.; Baldauf, R.W. Field assessment of the effects of roadside vegetation on near-road black carbon and particulate matter. *Sci. Total Environ.* **2013**, *468–469*, 120–129, <https://doi.org/10.1016/j.scitotenv.2013.08.001>.
19. Titos, G.; Lyamani, H.; Drinovec, L.; Olmo, F.; Mocnik, G.; Alados-Arboledas, L. Evaluation of the impact of transportation changes on air quality. *Atmospheric Environ.* **2015**, *114*, 19–31, <https://doi.org/10.1016/j.atmosenv.2015.05.027>.
20. Basagaña, X.; Triguero-Mas, M.; Agis, D.; Pérez, N.; Reche, C.; Alastuey, A.; Querol, X. Effect of public transport strikes on air pollution levels in Barcelona (Spain). *Sci. Total Environ.* **2017**, *610–611*, 1076–1082, <https://doi.org/10.1016/j.scitotenv.2017.07.263>.
21. Bel, G.; Holst, M. Evaluation of the impact of Bus Rapid Transit on air pollution in Mexico City. *Transp. Policy* **2018**, *63*, 209–220, <https://doi.org/10.1016/j.tranpol.2018.01.001>.
22. Di, P. Key Transport Statistics of World Cities. *Journeys*, September **2013**, 105–112. Available online: [www.lta.gov.sg/ltacademy/doc/13Sep105-Pan\\_KeyTransportStatistics.pdf](http://www.lta.gov.sg/ltacademy/doc/13Sep105-Pan_KeyTransportStatistics.pdf) Di et al. (2013) (accessed on 23 February 2022).
23. Rojas-Rueda, D.; de Nazelle, A.; Teixidó, O.; Nieuwenhuijsen, M. Health impact assessment of increasing public transport and cycling use in Barcelona: A morbidity and burden of disease approach. *Prev. Med.* **2013**, *57*, 573–579, <https://doi.org/10.1016/j.ypmed.2013.07.021>.
24. Poelman, H.; Dijkstra, L. Measuring access to public transport in European cities. *Regional working paper 2015*. European Commission: Brussel, Belgium, 2015. Available online: [https://ec.europa.eu/regional\\_policy/sources/docgener/work/2015\\_01\\_publ\\_transp.pdf](https://ec.europa.eu/regional_policy/sources/docgener/work/2015_01_publ_transp.pdf) (accessed on 23 February 2022).
25. Johansson, C.; Burman, L.; Forsberg, B. The effects of congestions tax on air quality and health. *Atmos. Environ.* **2009**, *43*, 4843–4854, <https://doi.org/10.1016/j.atmosenv.2008.09.015>.
26. Panis, L.I.; Broekx, S.; Liu, R. Modelling instantaneous traffic emission and the influence of traffic speed limits. *Sci. Total Environ.* **2006**, *371*, 270–285, <https://doi.org/10.1016/j.scitotenv.2006.08.017>.
27. Soret, A.; Guevara, M.; Baldasano, J. The potential impacts of electric vehicles on air quality in the urban areas of Barcelona and Madrid (Spain). *Atmospheric Environ.* **2014**, *99*, 51–63, <https://doi.org/10.1016/j.atmosenv.2014.09.048>.
28. Bruckmann, P.; Wurzler, S.; Brandt, A.; Vogt, K. Erfahrungen mit Umweltzonen in Nordrhein-Westfalen. In: Bundesamt für Strahlenschutz, Bundesinstitut für Risikobewertung, Robert Koch-Institut, Umweltbundesamt, editor. UMID Umwelt und Mensch—Informationsdienst: Berlin, Germany, 2011; pp. 27–33.
29. Lutz, M. Low emission zones & air quality in German cities. Clean Air Workshop, Berlin, September 2013. Available online: [http://s0941a8dda1227123.jimcontent.com/download/version/1378908467/module/5819981464/name/Lutz\\_Umweltzonen%20und%20Luftqualit%C3%A4t.pdf](http://s0941a8dda1227123.jimcontent.com/download/version/1378908467/module/5819981464/name/Lutz_Umweltzonen%20und%20Luftqualit%C3%A4t.pdf) (accessed online 23 February 2022)
30. Wolff, H., Keep your clunker in the suburb: Low-emission zones and adoption of green vehicles. *Econ. J.* **2014**, *124*, F481–F512, doi:10.1111/eco.j.1209.
31. Fensterer, V.; Küchenhoff, H.; Maier, V.; Wichmann, H.-E.; Breitner, S.; Peters, A.; Gu, J.; Cyrys, J. Evaluation of the impact of low emission zone and heavy traffic ban in Munich (Germany) on the reduction on PM<sub>10</sub> in ambient air. *Int. J. Environ. Res. Public Health* **2014**, *11*, 5094–5112. doi: 10.3390/ijerph110505094.
32. Gehrsitz, M. The effect of low emission zones on air pollution and infant health. *J. Environ. Econ. Manag.* **2017**, *83*, 121–144. [10.1016/j.jeem.2017.02.003](https://doi.org/10.1016/j.jeem.2017.02.003).
33. Bruxelles Environment: Evaluation de la Zone de Basses Emissions, Rapport 2018, May 2019. Available online: [https://www.lez.brussels/sites/default/files/rapp\\_2018\\_lez\\_fr\\_final.pdf](https://www.lez.brussels/sites/default/files/rapp_2018_lez_fr_final.pdf) (accessed on 17 October 2021).

34. Mudway, I.S.; Dundas, I.; Wood, H.E.; Marlin, N.; Jamaludin, J.B.; Bremner, S.A.; Cross, L.; Grieve, A.; Nanzer, A.; Barratt B.M., et al. Impact of London's low emission zone on air quality and children's respiratory health: A sequential annual cross-sectional study. *Lancet Public Health* **2019**, *4*(1), e28–e40. doi: 10.1016/S2468-2667(18)30202-0.
35. Santos, F.M.; Gómez-Losada, A.; Pires, J.C.M. Impact of the implementation of Lisbon low emission zone on air quality. *J. Hazard. Mater.* **2019**, *365*, 632–641.
36. Jeanjean, A.P.R.; Monks, P.S.; Leigh, R.J. Modelling the effectiveness of urban trees and grass on PM<sub>2.5</sub> reduction via dispersion and deposition at a city scale. *Atmos. Environ.* **2016**, *147*, 1–10.
37. Selmi, W.; Weber, C.; Rivière, E.; Blond, N.; Mehdi, L.; Nowak, D. Air pollution removal by trees in public green spaces in Strasbourg city, France. *Urban For. Urban Green.* **2016**, *17*, 192–201.
38. Rao, M.; George, L.A.; Rosentiel, T.N.; Shandas, V.; Dinno, A. Assessing the relationship among urban trees, nitrogen dioxide, and respiratory health. *Environ Pollut.* **2014**, *194*, 96–104. doi: 10.1016/j.envpol.2014.07.011.
39. Rafael, S.; Vicente, B.; Rodrigues, V.; Miranda, A.I.; Borrego, C.; Lopes, M. Impacts of green infrastructures on aerodynamic flow and air quality in Porto's urban area. *Atmos. Environ.* **2018**, *190*, 317–330.
40. Riondato, E.; Pilla, F.; Basu, A.S.; Basu, B. Investigating the effect of trees on urban quality in Dublin by combining air monitoring with i-Tree Eco model. *Sustain. Cities Soc.* **2020**, *61*, 102356.
41. Nemitz, E.; Vieno, M.; Carnell, E.; Fitch, A.; Steadman, C.; Cryle, P.; Jones, L. Potential and limitation of air pollution mitigation by vegetation and uncertainties of deposition-based evaluations. *Philos. Transact. A Math. Phys. Eng. Sci.* **2020**, *378*, 2183.
42. Dijkema, M.B.A.; van der Zee, S.C.; Brunekreef, B.; van Strien, R.T. Air quality effects of an urban highway speed limit reduction. *Atmos. Environ.* **2008**, *42*, 9098–9105.
43. Bel, G.; Rossell, J. Effects of the 80km/h and variable speed limits on air pollution in the metropolitan area of Barcelona. *Transp. Res. Part D Transp. Environ.* **2013**, *23*, 90–97.
44. Gulia, S.; Mittal, A.; Khare, M. Quantitative evaluation of source interventions for urban air quality improvement—a case study of Delhi city. *Atmos. Pollut. Res.* **2018**, *9*(3), 577–583.
45. Amato, F.; Karanasiou, A.; Cordoba, P.; Alastuey, A.; Moreno, T.; Lucarelli, F.; Nava, S.; Calzolari, G.; Querol, X. Effects of Road Dust Suppressants on PM Levels in a Mediterranean Urban Area. *Environ. Sci. Technol.* **2014**, *48*, 14.
46. Ferrero, E.; Alessandrini, S.; Balanzino, A. Impact of the electric vehicles on air pollution from a highway. *Appl. Energy* **2016**, *169*, 450–459.
47. Harrison, R.M.; Beddows, D.C.; Efficacy of Recent Emissions Controls on Road Vehicles in Europe and Implications for Public Health. *Sci. Rep.* **2017**, *7*, 1152.
48. Izquierdo, R.; Santos, S.G.; Dos, Borge, R.; de la Paz, D.; Sarigiannis, D.; Gotti, A.; Boldo, E. Health impact assessment by the implementation of Madrid City air-quality plan in 2020. *Environ. Res.* **2020**, *183*, 109021. doi: <https://doi.org/10.1016/j.envres.2019.109021>.
